# Supplementary material for: Flexoelectricity in hydroxyapatite for the enhanced piezocatalytic degradation of phenanthrene in soil
Source: Royal Society of Chemistry journal article supplement (doi:10.1039/d3im00093a), 2023-10-11
Supplement: d3im00093a1.pdf [file d3im00093a1.pdf]

## **Flexoelectricity in hydroxyapatite for enhanced piezocatalytic degradation of phenanthrene in soil**

Jun Han, Wenrou Tian, Ye Miao, Najun Li,\* Dongyun Chen, Qingfeng Xu, Hua Li and Jianmei Lu\*

*College of Chemistry, Chemical Engineering and Materials Science, Collaborative Innovation Center of Suzhou Nano Science and Technology, Soochow University, Suzhou 215123, China*

*\*Correspondence to: J. M. Lu (E-mail: [ljm@suda.edu.cn](mailto:ljm@suda.edu.cn)) and N. J. Li (E-mail: [linajun@suda.edu.cn](mailto:linajun@suda.edu.cn)), Tel.: 86 512 65880368*

## **Supporting Information**

**Table S1** The parameters of GC-MS test for PHE concentration in soil

| <b>Gas Chromatography</b>                     |                                                                                                                                                         |
|-----------------------------------------------|---------------------------------------------------------------------------------------------------------------------------------------------------------|
| <b>Injector temperature</b>                   | 280 °C                                                                                                                                                  |
| <b>Injection volume</b>                       | 1.0 µL                                                                                                                                                  |
| <b>Gas flow rate</b>                          | 1.0 mL min <sup>-1</sup>                                                                                                                                |
| <b>Column temperature</b>                     | 80 °C for 2 min; raised to 180 °C at rate of 20 °C min <sup>-1</sup> for 5 min; finally, raised to 290 °C at rate of 10 °C min <sup>-1</sup> for 5 min. |
| <b>Mass Spectrometer (Selective Ion Mode)</b> |                                                                                                                                                         |
| <b>Ion power temperature</b>                  | 230 °C                                                                                                                                                  |
| <b>Ionization energy</b>                      | 70 eV                                                                                                                                                   |
| <b>Interface temperature</b>                  | 280 °C                                                                                                                                                  |
| <b>Quadrupole temperature</b>                 | 150 °C                                                                                                                                                  |
| <b>Mass scan range</b>                        | 45-450 amu                                                                                                                                              |
| <b>Solvent delay time</b>                     | 5 min                                                                                                                                                   |

**Table S2** the F content of different catalysts

|                             | <b>HAP@FAP-<br/>0.5</b> | <b>HAP@FAP-<br/>1</b> | <b>HAP@FAP-<br/>1.5</b> | <b>HAP@FAP-<br/>2</b> | <b>F(1.5)-<br/>HAP</b> |
|-----------------------------|-------------------------|-----------------------|-------------------------|-----------------------|------------------------|
| <b>Concentration of NaF</b> | 2 mM                    | 4 mM                  | 6 mM                    | 8 mM                  | 6 mM                   |
| <b>F</b>                    | 7.30                    | 8.48                  | 10.25                   | 10.75                 | 13.52                  |
| <b>Ca</b>                   | 92.40                   | 90.52                 | 89.75                   | 89.25                 | 86.48                  |
| <b>F : Ca</b>               | 8.23%                   | 10.47%                | 11.42%                  | 11.98%                | 15.63%                 |
| <b>Feeding ratio</b>        | 5%                      | 10%                   | 15%                     | 20%                   | 15%                    |

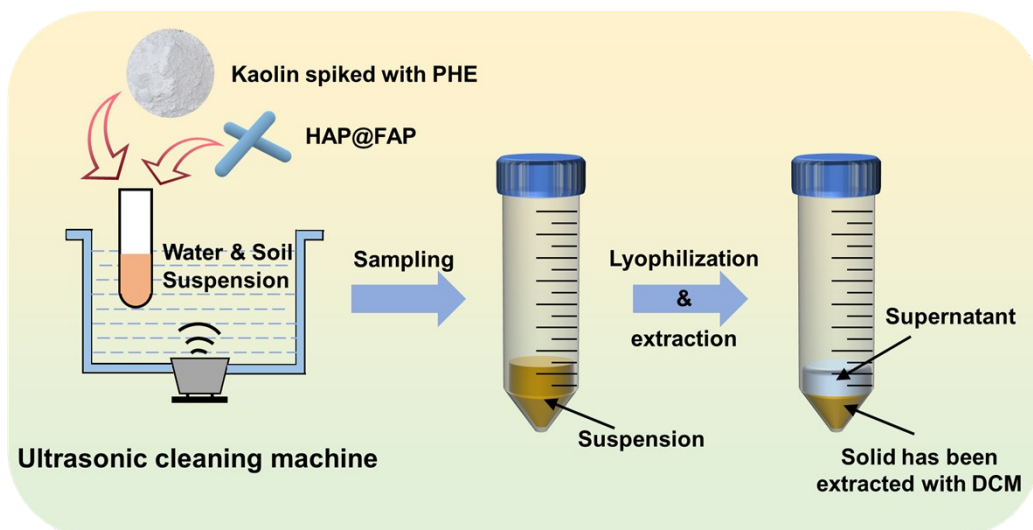

Fig. S1 The schematic diagram of the piezocatalytic degradation experiment.

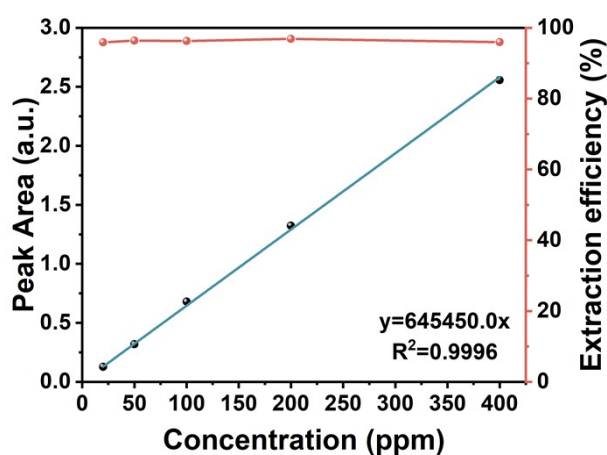

Fig. S2 Standard curve and extraction efficiency of PHE from soil.

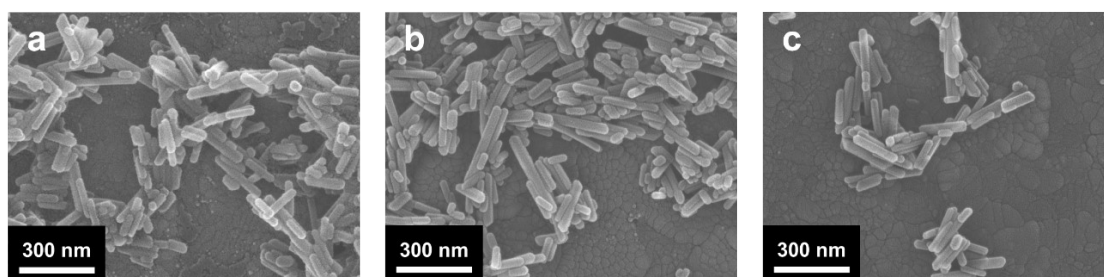

Fig. S3 SEM images of (a) HAP@FAP-0.5; (b)HAP@FAP-1 and (c) HAP@FAP-2.

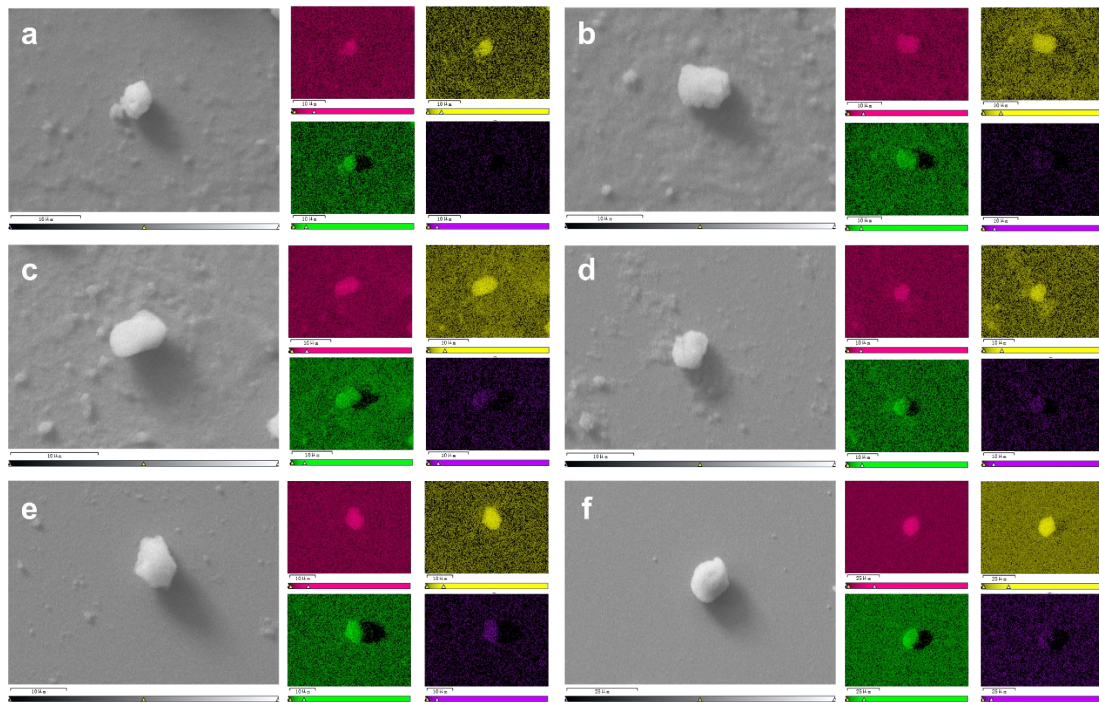

**Fig. S4** EDS mapping of (a) HAP; (b) HAP@FAP-0.5; (c) HAP@FAP-1; (d) HAP@FAP-1.5; (e) HAP@FAP-2 and (f) F(1.5)-HAP (Scale bar: 10 μm. Pink, Ca element; yellow, P element; green, O element; purple, F element).

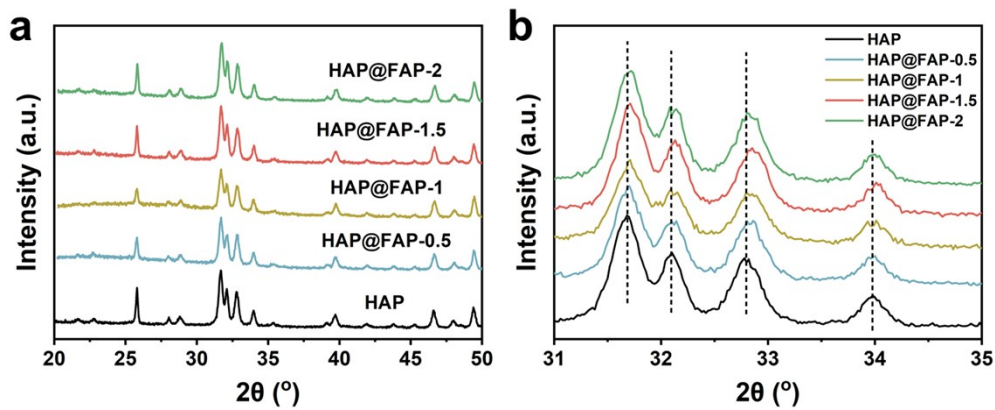

**Fig. S5** The XRD pattern of (a) HAP and HAP@FAP-x; (b) its enlargement between 31-35°.

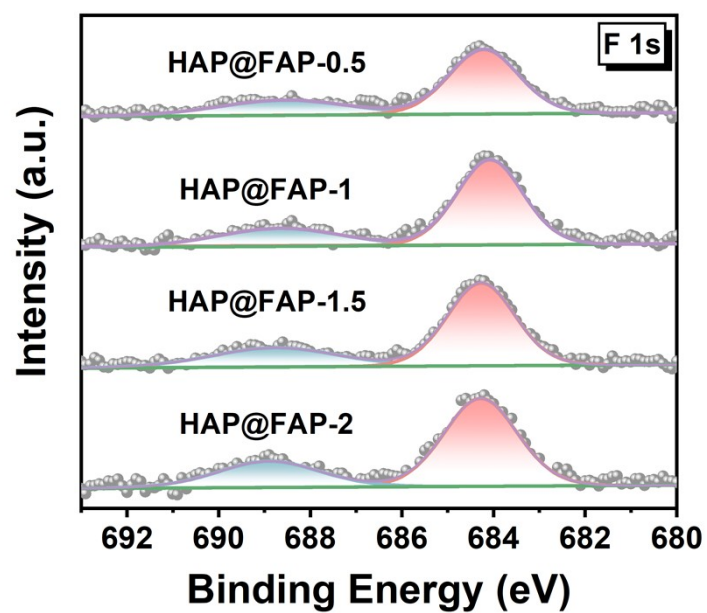

Fig. S6 F 1s high-resolution XPS spectra of HAP@FAP-x ( $x=0.5-2$ ).

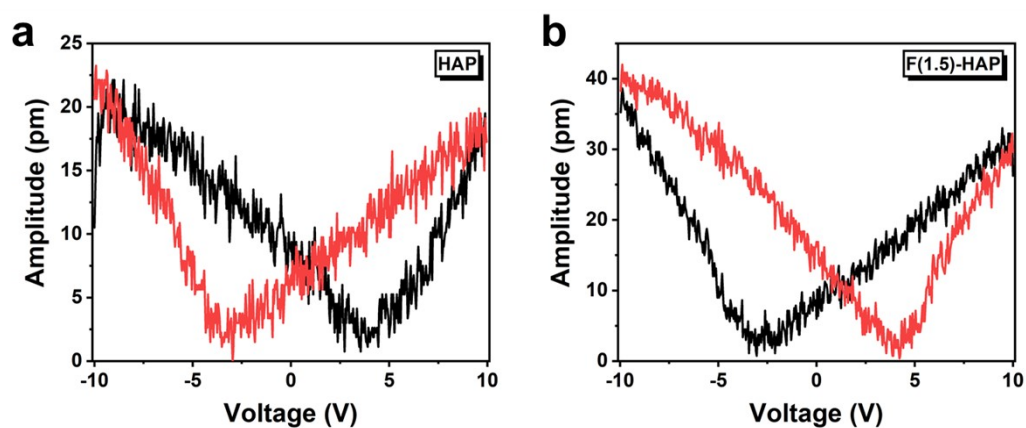

Fig. S7 PFM amplitude diagram of (c) HAP and (b) F(1.5)-HAP.

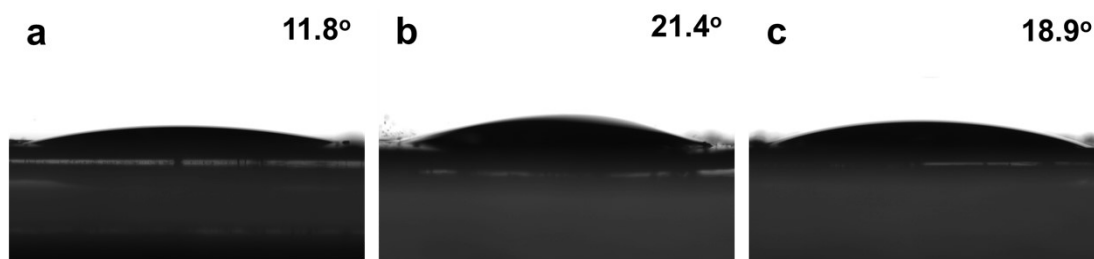

**Fig. S8** The water contact angle of (a) HAP; (b) HAP@FAP-1.5 and (c) F(1.5)-HAP.

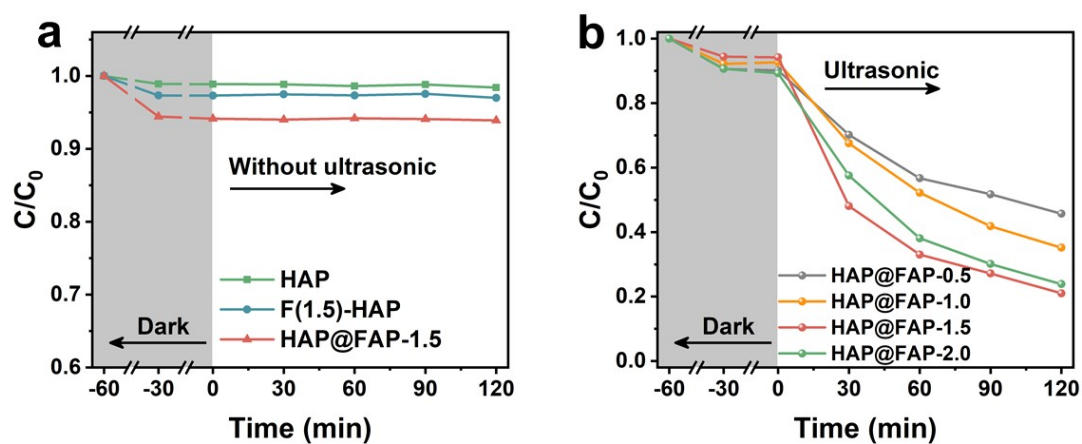

**Fig. S9** (a) the degradation efficiency of PHE by HAP, F(1.5)-HAP, HAP@FAP-1.5 without ultrasonic and (b) HAP@FAP-x with gradient F-doping.

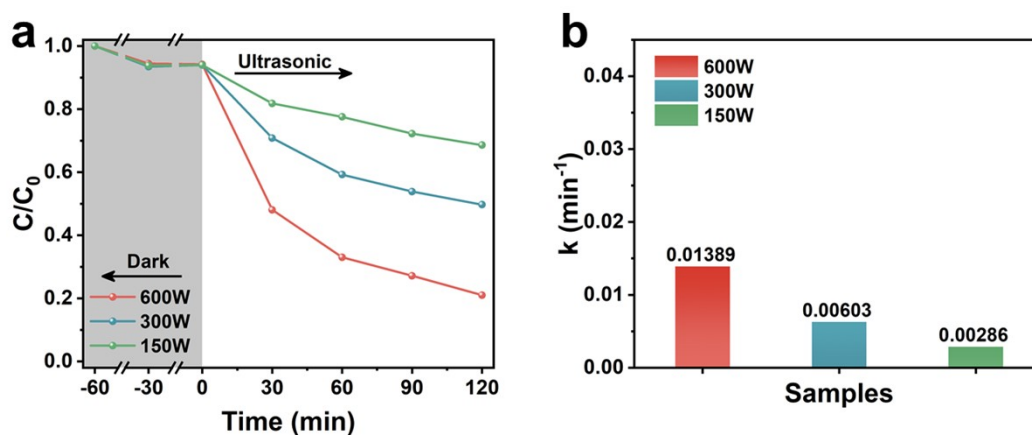

**Fig. S10** (a) the degradation efficiency of PHE by HAP@FAP-1.5 under different ultrasonic powers and (b) the corresponding degradation kinetic rate constants ( $\text{min}^{-1}$ ).

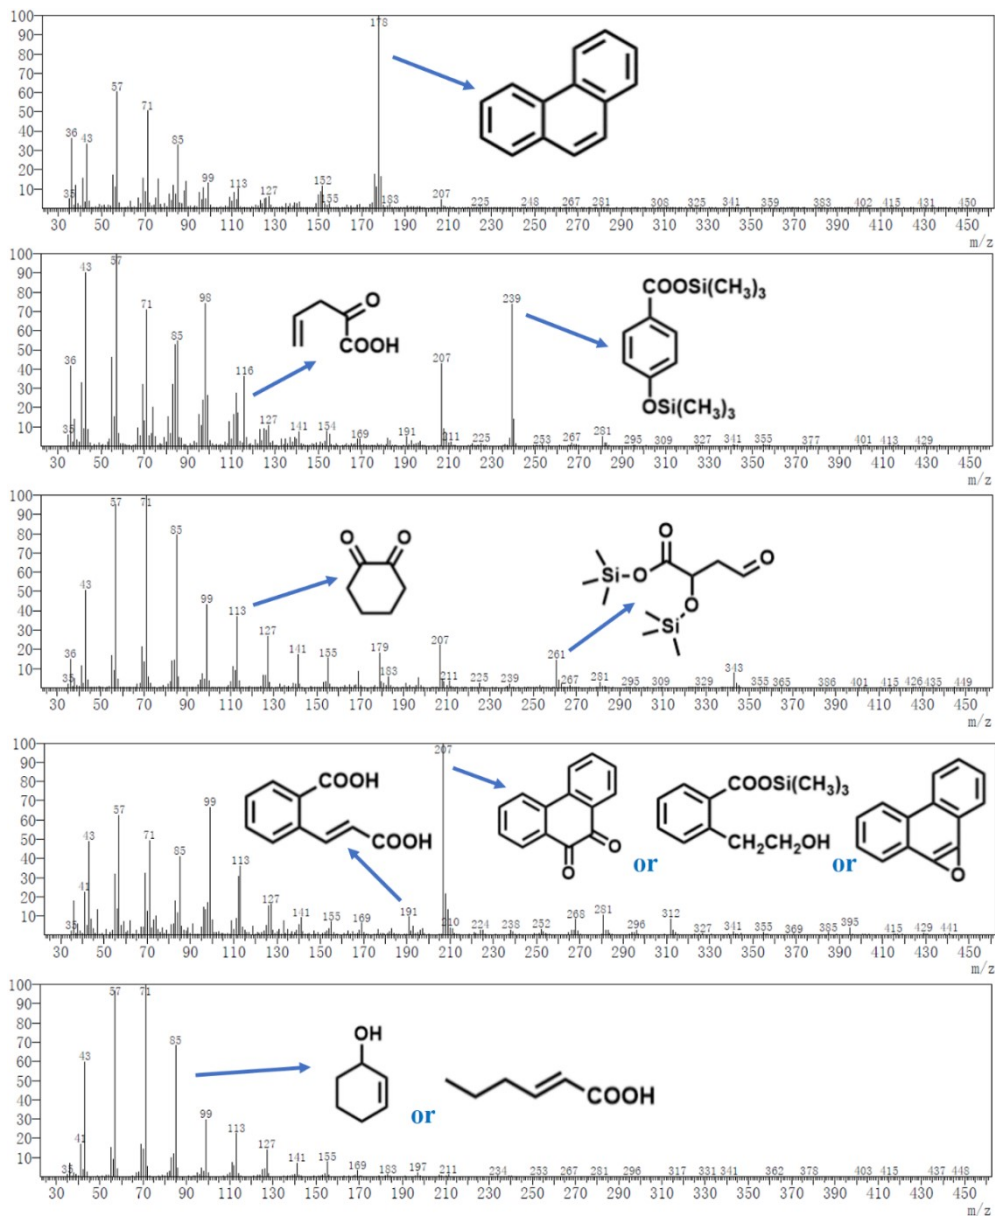

**Fig. S11** The GC-MS results of intermediates in the degradation of PHE.

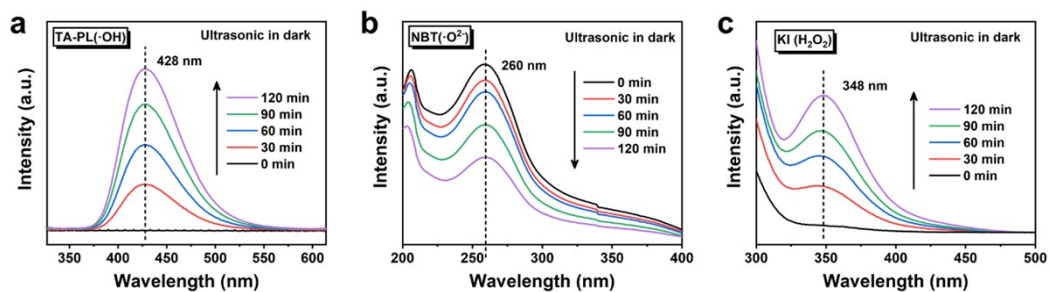

**Fig. S12** (a) TA-PL; (b) NBT transformation and (c) iodide method under ultrasonic to detect  $\cdot\text{OH}$ ,  $\cdot\text{O}_2^-$  and  $\text{H}_2\text{O}_2$  produced by HAP@FAP-1.5 under ultrasonic.
